# Supplementary material for: Tick-Borne Encephalitis Virus and Its European Distribution in Ticks and Endothermic Mammals
Source: PubMed Central journal article supplement (PMC7409098; doi:10.3390/microorganisms8071065), 2020-07-17
Supplement: microorganisms-08-01065-s001.pdf [file microorganisms-08-01065-s001.pdf]

## Appendix A

Complete list of the references with georeferenced tick-borne encephalitis virus detections in ticks and endothermic mammals except for humans used in this study.

| Country        | References                                                                                                                                                                                                                                                                          | Country | References                                                                                                                                                                                                                                         |
|----------------|-------------------------------------------------------------------------------------------------------------------------------------------------------------------------------------------------------------------------------------------------------------------------------------|---------|----------------------------------------------------------------------------------------------------------------------------------------------------------------------------------------------------------------------------------------------------|
| Austria        | Duscher et al. (2015)<br>Ecker et al. (1999)<br>Kunz et al. (1967)<br>Kunz et al. (1969)<br>Radda et al. (1971)<br>Weissenböck et al. (1998)                                                                                                                                        | Germany | Bestehorn et al. (2018)<br>Bingsohn et al. (2013)<br>Böhm et al. (2017)<br>Boelke et al. (2019)<br>Bröker et al. (2019)<br>Dobler (2018)                                                                                                           |
| Belgium        | Roelandt et al. (2011)<br>Roelandt et al. (2014)<br>Roelandt et al. (2016)<br>Tavernier et al. (2015)                                                                                                                                                                               |         | Ecker et al. (1999)<br>Eistetter et al. (1998)<br>Frimmel et al. (2010)<br>Frimmel et al. (2014)<br>Frimmel et al. (2016)                                                                                                                          |
| Czech Republic | Danielová et al. (2002)<br>Danielová et al. (2008)<br>Ecker et al. (1999)<br>Ernek et al. (1967)<br>Grešíková and Nosek (1967)<br>Hönig et al. (2015)<br>Kožuch et al. (1967)<br>Krivanec et al. (1988)<br>Nosek et al. (1970)<br>Širmarová et al. (2014)<br>Weidmann et al. (2011) |         | Gerth et al. (1995)<br>Holbach and Oehme (2002)<br>Janitza-Futterer (2003)<br>Kiffner et al. (2011)<br>Klaus et al. (2010a)<br>Klaus et al. (2010b)<br>Klaus et al. (2012)<br>Klaus et al. (2013)<br>Kupča et al. (2010)<br>Mehlhorn et al. (2015) |
| Denmark        | Agergaard et al. (2019)<br>Andersen et al. (2019b)<br>Andersen et al. (2019a)<br>Fomsgaard et al. (2013)<br>Lindhe et al. (2009)<br>Petersen et al. (2019)<br>Skarphéðinsson et al. (2005)                                                                                          |         | Müller (1970)<br>Müller (2006)<br>Oehme et al. (2002)<br>Pluta (2011)<br>Ramelow et al. (1993)<br>Rieger et al. (1999)<br>Skuballa (2011)<br>Stefanoff et al. (2012)                                                                               |
| Estonia        | Katargina et al. (2013)                                                                                                                                                                                                                                                             |         | Süss et al. (2006)                                                                                                                                                                                                                                 |
| Finland        | Brummer-Korvenkontio et al. (1973)<br>Ecker et al. (1999)<br>Laaksonen et al. (2017)<br>Levanov et al. (2016)<br>Lindblom et al. (2014)<br>Smura et al. (2019)<br>Sormunen et al. (2018)                                                                                            | Hungary | Süss et al. (1997)<br>Ecker et al. (1999)<br>Lakos et al. (2019)<br>Nosek et al. (1970)<br>Pintér et al. (2013)<br>Šikutová et al. (2009)                                                                                                          |
| France         | Tonteri et al. (2016)<br>Bestehorn et al. (2018)<br>Ecker et al. (1999)                                                                                                                                                                                                             | Italy   | Zöldi et al. (2014)<br>Cagnacci et al. (2012)<br>Capelli et al. (2012)<br>Carpi et al. (2009)<br>Carpi et al. (2009)<br>D'Agaro et al. (2009)<br>Hudson et al. (2001)                                                                              |
| Germany        | Perez-Eid et al. (1992)<br>Achazi et al. (2011)<br>Balling et al. (2014)<br>Balling et al. (2015)                                                                                                                                                                                   |         |                                                                                                                                                                                                                                                    |

| <b>Country</b> | <b>References</b>          | <b>Country</b> | <b>References</b>           |
|----------------|----------------------------|----------------|-----------------------------|
| Liechtenstein  | Rosà et al. (2019)         | Poland         | Stefanoff et al. (2012)     |
| Lithuania      | Aberham et al. (1992)      |                | Wójcik-Fatla et al. (2011)  |
|                | Han et al. (2005)          |                | Zajac et al. (2017)         |
|                | Juceviciene et al. (2005)  | Romania        | Salat et al. (2017)         |
| Netherlands    | Katargina et al. (2013)    | Slovakia       | Cagnacci et al. (2012)      |
|                | Jahfari et al. (2017)      |                | Csank et al. (2018)         |
| Norway         | Rijks et al. (2019)        |                | Labuda et al. (2002)        |
|                | Andreassen et al. (2012)   |                | Nosek et al. (1970)         |
|                | Csángó et al. (2004)       | Slovenia       | Durmiši et al. (2011)       |
|                | Kjelland et al. (2018)     |                | Knap et al. (2012)          |
|                | Larsen et al. (2014)       | Sweden         | Asghar et al. (2017)        |
|                | Paulsen et al. (2018)      |                | Brinck et al. (1967)        |
|                | Sidorenko et al. (2018)    |                | Brinkley et al. (2008)      |
|                | Traavik (1973)             |                | Grandi et al. (2018)        |
|                | Traavik et al. (1978)      |                | Lindblom et al. (2014)      |
| Poland         | Ytrehus et al. (2013)      |                | Melik et al. (2007)         |
|                | Bajer et al. (2014)        |                | Pettersson et al. (2014)    |
|                | Biernat et al. (2014b)     |                | von Zeipel et al. (1959)    |
|                | Biernat et al. (2014a)     |                | von Zeipel (1959)           |
|                | Biernat et al. (2016)      | Switzerland    | Burri et al. (2011)         |
|                | Cisak et al. (2002)        |                | Casati (2006)               |
|                | Cisak et al. (2012)        |                | Casati Pagani et al. (2019) |
| Poland         | Cuber et al. (2015)        |                | Ecker et al. (1999)         |
|                | Danielová et al. (2010)    |                | Gäumann et al. (2010)       |
|                | Drelich et al. (2014)      |                | Ineichen (2019)             |
|                | Grzybek et al. (2018)      |                | Lommano et al. (2012)       |
|                | Katargina et al. (2013)    |                | Rieille et al. (2014)       |
|                | Kowalewska et al. (1997)   |                | Rieille et al. (2017)       |
|                | Makówka et al. (2009)      |                | Wandeler et al. (1972)      |
|                | Mierzejewska et al. (2015) |                | Wicki et al. (2000)         |
|                | Stefanoff et al. (2008)    |                |                             |

## References

- Aberham C, Radda A, Holzmann H, Krech R (1992) Detection of tick-borne encephalitis (TBE) virus in Liechtenstein. *Zbl Bakteriol* 277(4):554–560, DOI 10.1016/S0934-8840(11)80481-0
- Achazi K, Růžek D, Donoso-Mantke O, Schlegel M, Ali HS, Wenk M, Schmidt-Chanasit J, Ohlmeyer L, Rühle F, Vor T, Kiffner C, Kallies R, Ulrich RG, Niedrig M (2011) Rodents as sentinels for the prevalence of tick-borne encephalitis virus. *Vector Borne Zoonotic Dis* 11(6):641–647, DOI 10.1089/vbz.2010.0236
- Agergaard CN, Rosenstjerne MW, Bødker R, Rasmussen M, Andersen PHS, Fomsgaard (2019) New tick-borne encephalitis virus hot spot in Northern Zealand, Denmark, October 2019. *Euro Surveill* 24(43):pii=1900639, DOI 10.2807/1560-7917.es.2019.24.43.1900639
- Andersen NS, Bestehorn M, Chitimia-Dobler L, Kolmos HJ, Jensen PM, Dobler G, Skarphéðinsson S (2019a) Phylogenetic characterization of tick-borne encephalitis virus from Bornholm, Denmark. *Ticks Tick Borne Dis* 10(3):533–539, DOI 10.1016/j.ttbdis.2018.12.008
- Andersen NS, Larsen SL, Olesen CR, Stiasny K, Kolmos HJ, Jensen PM, Skarphéðinsson S (2019b) Continued expansion of tick-borne pathogens: Tick-borne encephalitis virus complex and *Anaplasma phagocytophilum* in Denmark. *Ticks Tick Borne Dis* 10(1):115–123, DOI 10.1016/j.ttbdis.2018.09.007
- Andreassen A, Jore S, Cuber P, Dudman S, Tengs T, Isaksen K, Hygen HO, Viljugrein H, Ånestad G, Ottesen P, Vainio K (2012) Prevalence of tick borne encephalitis virus in tick nymphs in relation to climatic factors on the southern coast of Norway. *Parasit Vectors* 5(1):177, DOI 10.1186/1756-3305-5-177
- Asghar N, Pettersson JHO, Dinnetz P, Andreassen Å, Johansson M (2017) Deep sequencing analysis of tick-borne encephalitis virus from questing ticks at natural foci reveals similarities between quasispecies pools of the virus. *J Gen Virol* 98(3):413–421, DOI 10.1099/jgv.0.000704
- Bajer A, Mierzejewska EJ, Rodo A, Bednarska M, Kowalec M, Welc-Falęciak R (2014) The risk of vector-borne infections in sled dogs associated with existing and new endemic areas in Poland. *Vet Parasitol* 202(3–4):276–286, DOI 10.1016/j.vetpar.2013.12.033
- Balling A, Plessow U, Beer M, Pfeffer M (2014) Prevalence of antibodies against tick-borne encephalitis virus in wild game from Saxony, Germany. *Ticks Tick Borne Dis* 5(6):805–809, DOI 10.1016/j.ttbdis.2014.06.007
- Balling A, Beer M, Gniel D, Pfeffer M (2015) [Prevalence of antibodies against tick-borne encephalitis virus in dogs from Saxony, Germany]. *Berl Munch Tierarztl Wochenschr* 128(7/8):297–303, DOI 10.2376/0005-9366-128-297, in German
- Bestehorn M, Weigold S, Kern WV, Chitimia-Dobler L, Mackenstedt U, Dobler G, Borde JP (2018) Phylogenetics of tick-borne encephalitis virus in endemic foci in the upper Rhine region in France and Germany. *PLoS ONE* 13(10):e0204790, DOI 10.1371/journal.pone.0204790
- Biernat B, Cieniuch S, Stańczak J (2014a) Detection of TBEV RNA in *Ixodes ricinus* ticks in north-eastern Poland. *Ann Agric Environ Med* 21(4):689–692, DOI 10.5604/12321966.1129915
- Biernat B, Karbowski G, Werszko J, Stańczak J (2014b) Prevalence of tick-borne encephalitis virus (TBEV) RNA in *Dermacentor reticulatus* ticks from natural and urban environment, Poland. *Exp Appl Acarol* 64(4):543–551, DOI 10.1007/s10493-014-9836-5
- Biernat B, Karbowski G, Stańczak J, Masny A, Werszko J (2016) The first detection of the tick-borne encephalitis virus (TBEV) RNA in *Dermacentor reticulatus* ticks collected from the lowland European bison (*Bison bonasus bonasus* L.). *Acta Parasitol* 61(1):130–135, DOI 10.1515/ap-2016-0017

- Bingsohn L, Beckert A, Zehner R, Kuch U, Oehme R, Kraiczky P, Amendt J (2013) Prevalences of tick-borne encephalitis virus and *Borrelia burgdorferi* sensu lato in *Ixodes ricinus* populations of the Rhine-Main region, Germany. *Ticks Tick Borne Dis* 4(3):207–213, DOI 10.1016/j.ttbdis.2012.11.012
- Boelke M, Bestehorn M, Marchwald B, Kubinski M, Liebig K, Glanz J, Schulz C, Dobler G, Monazahian M, Becker SC (2019) First isolation and phylogenetic analyses of tick-borne encephalitis virus in Lower Saxony, Germany. *Viruses* 11(5):462, DOI 10.3390/v11050462
- Böhm B, Schade B, Bauer B, Hoffmann B, Hoffmann D, Ziegler U, Beer M, Klaus C, Weissenböck H, Böttcher J (2017) Tick-borne encephalitis in a naturally infected sheep. *BMC Vet Res* 13(1):267, DOI 10.1186/s12917-017-1192-3
- Brinck P, Johnels A, Lundholm B, Svedmyr A, von Zeipel G, Zetterberg B (1967) Small mammals in Sweden as hosts of tick-borne encephalitis virus and vagrant ectoparasites. *Oikos* 18(1):124, DOI 10.2307/3564640
- Brinkley C, Nolskog P, Golovljova I, Lundkvist Å, Bergström T (2008) Tick-borne encephalitis virus natural foci emerge in western Sweden. *Int J Med Microbiol* 298:73–80, DOI 10.1016/j.ijmm.2007.12.005
- Bröker M, Chitimia-Dobler L, Dobler G (2019) [Ticks and tick-borne encephalitis in the district Marburg-Biedenkopf]. *Philippia* 17(4):279–288, in German
- Brummer-Korvenkontio M, Saikku P, Korhonen P, Oker-Blom N (1973) Arboviruses in Finland. I. Isolation of tick-borne encephalitis (TBE) virus from arthropods, vertebrates, and patients. *Am J Trop Med Hyg* 22(3):382–389
- Burri C, Bastic V, Maeder G, Patalas E, Gern L (2011) Microclimate and the zoonotic cycle of tick-borne encephalitis virus in Switzerland. *J Med Entomol* 48(3):615–627, DOI 10.1603/me10180
- Cagnacci F, Bolzoni L, Rosà R, Carpi G, Hauße H, Valent M, Tagliapietra V, Kazimirova M, Koci J, Stanko M, Lukan M, Henttonen H, Rizzoli A (2012) Effects of deer density on tick infestation of rodents and the hazard of tick-borne encephalitis. I: Empirical assessment. *Int J Parasitol* 42(4):365–372, DOI 10.1016/j.ijpara.2012.02.012
- Capelli G, Ravagnan S, Montarsi F, Ciocchetta S, Cazzin S, Porcellato E, Babiker AM, Cassini R, Salviato A, Cattoli G, Otranto D (2012) Occurrence and identification of risk areas of *Ixodes ricinus*-borne pathogens: a cost-effectiveness analysis in north-eastern Italy. *Parasit Vectors* 5(1):61, DOI 10.1186/1756-3305-5-61
- Carpi G, Bertolotti L, Rosati S, Rizzoli A (2009) Prevalence and genetic variability of tick-borne encephalitis virus in host-seeking *Ixodes ricinus* in northern Italy. *J Gen Virol* 90(12):2877–2883, DOI 10.1099/vir.0.013367-0
- Casati S (2006) Diversity of the population of tick-borne encephalitis virus infecting *Ixodes ricinus* ticks in an endemic area of central Switzerland (Canton Bern). *J Gen Virol* 87(8):2235–2241, DOI 10.1099/vir.0.81783-0
- Casati Pagani S, Frigerio Malossa S, Klaus C, Hoffmann D, Beretta O, Bomio-Pacciorini N, Lazzaro M, Merlani G, Ackermann R, Beuret C (2019) First detection of TBE virus in ticks and sero-reactivity in goats in a non-endemic region in the southern part of Switzerland (Canton of Ticino). *Ticks Tick Borne Dis* 10(4):868–874, DOI 10.1016/j.ttbdis.2019.04.006
- Cisak E, Chmielewska-Badora J, Rajtar B, Dutkiewicz J (2002) Study on the occurrence of *Borrelia burgdorferi* sensu lato and tick-borne encephalitis virus (TBEV) in ticks collected in Lublin region (eastern Poland). *Ann Agric Environ Med* 9(1):105–110
- Cisak E, Wójcik-Fatla A, Sroka J, Zajac V, Bilka-Zajac E, Chmurzyńska E, Dutkiewicz J (2012) Prevalence of tick-borne encephalitis virus antibodies in domestic and game animals from Eastern Poland. *Bull Vet Inst Pulawy* 56(3):275–278, DOI 10.2478/v10213-012-0049-6

- Csángó PA, Blakstad E, Kirtz GC, Pedersen JE, Czettel B (2004) Tick-borne encephalitis in Southern Norway. *Emerg Infect Dis* 10(3):533–534, DOI 10.3201/eid1003.020734
- Csank T, Drzewnioková P, Korytár L, Major P, Gyuranecz M, Pistl J, Bakonyi T (2018) A serosurvey of flavivirus infection in horses and birds in Slovakia. *Vector Borne Zoonotic Dis* 18(4):206–213, DOI 10.1089/vbz.2017.2216
- Cuber P, Andreassen Å, Vainio K, Asman M, Dudman S, Szilman P, Szilman E, Ottesen P, Ånestad G, Cieśla-Nobis S, Solarz K (2015) Risk of exposure to ticks (Ixodidae) and the prevalence of tick-borne encephalitis virus (TBEV) in ticks in Southern Poland. *Ticks Tick Borne Dis* 6(3):356–363, DOI 10.1016/j.ttbdis.2015.02.010
- D'Agaro P, Martinelli E, Burgnich P, Nazzi F, Fabbro SD, Iob A, Ruscio M, Pischiutti P, Campello C (2009) Prevalence of tick-borne encephalitis virus in *Ixodes ricinus* from a novel endemic area of North Eastern Italy. *J Med Virol* 81(2):309–316, DOI 10.1002/jmv.21389
- Danielová V, Holubová J, Daniel M (2002) Tick-borne encephalitis virus prevalence in *Ixodes ricinus* ticks collected in high risk habitats of the South-Bohemian region of the Czech Republic. *Exp Appl Acarol* 26(1/2):145–151, DOI 10.1023/a:1020966605960
- Danielová V, Schwarzová L, Materna J, Daniel M, Metelka L, Holubová J, Kříž B (2008) Tick-borne encephalitis virus expansion to higher altitudes correlated with climate warming. *Int J Med Microbiol* 298(S1):68–72, DOI 10.1016/j.ijmm.2008.02.005
- Danielová V, Daniel M, Schwarzová L, Materna J, Rudenko N, Golovchenko M, Holubová J, Grubhoffer L, Kilián P (2010) Integration of a tick-borne encephalitis virus and *Borrelia burgdorferi* sensu lato into mountain ecosystems, following a shift in the altitudinal limit of distribution of their vector, *Ixodes ricinus* (Krkonose Mountains, Czech Republic). *Vector Borne Zoonotic Dis* 10(3):223–230, DOI 10.1089/vbz.2009.0020
- Dobler G (2018) Personal communication.
- Drelich A, Andreassen Å, Vainio K, Kruszyński P, Wąsik TJ (2014) Prevalence of tick-borne encephalitis virus in a highly urbanized and low risk area in Southern Poland. *Ticks Tick Borne Dis* 5(6):663–667, DOI 10.1016/j.ttbdis.2014.04.020
- Durmiši E, Knap N, Saksida A, Trilar T, Duh D, Avšič-Županc T (2011) Prevalence and molecular characterization of tick-borne encephalitis virus in *Ixodes ricinus* ticks collected in Slovenia. *Vector Borne Zoonotic Dis* 11(6):659–664, DOI 10.1089/vbz.2010.0054
- Duscher GG, Wetscher M, Baumgartner R, Walder G (2015) Roe deer sera used for TBE surveillance in Austria. *Ticks Tick Borne Dis* 6(4):489–493, DOI 10.1016/j.ttbdis.2015.03.018
- Ecker M, Allison SL, Meixner T, Heinz FX (1999) Sequence analysis and genetic classification of tick-borne encephalitis viruses from Europe and Asia. *J Gen Virol* 80(1):179–185, DOI 10.1099/0022-1317-80-1-179
- Eistetter S, Kimming P, Oehme R (1998) [Untersuchungen zur Epidemiologie der FSME in Baden-Württemberg: Bestimmung der Zeckeninfestationsrate mithilfe eines modifizierten PCR-Verfahrens]. *Bundesgesundheitsbla* 41:62–66, in German
- Ernek E, Kožuch O, Grešíková M (1967) The distribution of antibodies against tick-borne encephalitis virus in domestic animals in the Tribeč region. *Bull World Health Organ* 36(Suppl. 1):73–80
- Fomsgaard A, Fertner ME, Essbauer S, Nielsen AY, Frey S, Lindblom P, Lindgren PE, Bødker R, Weidmann M, Dobler G (2013) Tick-borne encephalitis virus, Zealand, Denmark, 2011. *Emerg Infect Dis* 19(7):1171–1173, DOI 10.3201/eid1907.130092
- Frimmel S, Krienke A, Riebold D, Löbermann M, Littmann M, Fiedler K, Klaus C, Süss J, Reisinger E (2010) Tick-borne encephalitis virus in humans and ticks in Northeastern Germany. *Deut Med*

Wochenschr 135(27):1393–1396, DOI 10.1055/s-0030-1262424

- Frimmel S, Krienke A, Riebold D, Loebermann M, Littmann M, Fiedler K, Klaus C, Süß J, Reisinger EC (2014) Tick-borne encephalitis virus habitats in North East Germany: reemergence of TBEV in ticks after 15 years of inactivity. *Biomed Res Int* 2014:1–5, DOI 10.1155/2014/308371
- Frimmel S, Leister M, Löbermann M, Feldhusen F, Seelmann M, Süß J, Reisinger EC (2016) Seroprevalence of tick-borne-encephalitis virus in wild game in Mecklenburg-Western Pomerania (north-eastern Germany). *Ticks Tick Borne Dis* 7(6):1151–1154, DOI 10.1016/j.ttbdis.2016.08.004
- Gäumann R, Muhlemann K, Strasser M, Beuret CM (2010) High-throughput procedure for tick surveys of tick-borne encephalitis virus and its application in a national surveillance study in Switzerland. *Appl Environ Microbiol* 76(13):4241–4249, DOI 10.1128/aem.00391-10
- Gerth HJ, Grimshandl D, Stage B, Döller G, Kunz C (1995) Roe deer as sentinels for endemicity of tick-borne encephalitis virus. *Epidemiol Infect* 115(2):355–365, DOI 10.1017/s0950268800058477
- Grandi G, Aspán A, Pihl J, Gustafsson K, m FE, Jinnerot T, derlund RS, Chirico J (2018) Detection of tick-borne pathogens in lambs undergoing prophylactic treatment against ticks on two Swedish farms. *Front Vet Sci* 5:72, DOI 10.3389/fvets.2018.00072
- Grešiková M, Nosek J (1967) Isolation of tick-borne encephalitis virus from *Ixodes ricinus* ticks in the Tribeč region. *Bull World Health Organ* 36(Suppl. 1):67–71
- Grzybek M, Alsarraf M, Tołkacz K, Behnke-Borowczyk J, Biernat B, Stańczak J, Strachecka A, Guz L, Szczepaniak K, Paleolog J, Behnke JM, Bajer A (2018) Seroprevalence of TBEV in bank voles from Poland—a long-term approach. *Emerg Microbes Infect* 7(1):1–8, DOI 10.1038/s41426-018-0149-3
- Han X, Juceviciene A, Uzcategui NY, Brummer-Korvenkontio H, Zygtiene M, Jääskeläinen A, Leinikki P, Vapalahti O (2005) Molecular epidemiology of tick-borne encephalitis virus in *Ixodes ricinus* ticks in Lithuania. *J Med Virol* 77(2):249–256, DOI 10.1002/jmv.20444
- Holbach M, Oehme R (2002) [TBE and Lyme borreliosis. Spread of pathogens and risk of illness in a TBE region]. *MMW Fortschr Med* 144(Suppl. 4):113–118, in German
- Hönig V, Svec P, Halas P, Vavruskova Z, Tykalova H, Kilian P, Vetiskova V, Dornakova V, Sterbova J, Simonova Z, Erhart J, Sterba J, Golovchenko M, Rudenko N, Grubhoffer L (2015) Ticks and tick-borne pathogens in South Bohemia (Czech Republic) – Spatial variability in *Ixodes ricinus* abundance, *Borrelia burgdorferi* and tick-borne encephalitis virus prevalence. *Ticks Tick Borne Dis* 6(5):559–567, DOI 10.1016/j.ttbdis.2015.04.010
- Hudson PJ, Rizzoli A, Rosa R, Chemini C, Jones LD, Gould EA (2001) Tick-borne encephalitis virus in northern Italy: molecular analysis, relationships with density and seasonal dynamics of *Ixodes ricinus*. *Med Vet Entomol* 15(3):304–313, DOI 10.1046/j.0269-283x.2001.00317.x
- Ineichen F (2019) Personal communication.
- Jahfari S, de Vries A, Rijks JM, Van Gucht S, Vennema H, Sprong H, Rockx B (2017) Tick-borne encephalitis virus in ticks and roe deer, the Netherlands. *Emerg Infect Dis* 23(6):1028–1030, DOI 10.3201/eid2306.161247
- Janitza-Futterer D (2003) [Seroepidemiological investigation of endemic TBE infection in a horse and dog population in southwestern Germany]. PhD thesis, Ludwig Maximilian University of Munich, Germany, in German, 162 p.
- Juceviciene A, Zygtiene M, Leinikki P, Brummer-Korvenkontio H, Salminen M, Han X, Vapalahti O (2005) Tick-borne encephalitis virus infections in Lithuanian domestic animals and ticks. *Scand J Infect Dis* 37(10):742–746, DOI 10.1080/00365540510012134
- Katargina O, Russakova S, Geller J, Kondrusik M, Zajkowska J, Zygtiene M, Bormane A, Trofimova J,

- Golovljova I (2013) Detection and characterization of tick-borne encephalitis virus in Baltic countries and Eastern Poland. PLoS ONE 8(5):e61374, DOI 10.1371/journal.pone.0061374
- Kiffner C, Vor T, Hagedorn P, Niedrig M, R  he F (2011) Determinants of tick-borne encephalitis virus antibody presence in roe deer (*Capreolus capreolus*) sera. Med Vet Entomol 26(1):18–25, DOI 10.1111/j.1365-2915.2011.00961.x
- Kjelland V, Paulsen KM, Rollum R, Jenkins A, Stuen S, Soleng A, Edgar KS, Lindstedt HH, Vaino K, Gibory M, Andreassen   K (2018) Tick-borne encephalitis virus, *Borrelia burgdorferi* sensu lato, *Borrelia miyamotoi*, *Anaplasma phagocytophilum* and *Candidatus Neoehrlichia mikurensis* in *Ixodes ricinus* ticks collected from recreational islands in southern Norway. Ticks Tick Borne Dis 9(5):1098–1102, DOI 10.1016/j.ttbdis.2018.04.005
- Klaus C, Hoffmann B, Beer M, M  ller W, Stark B, Bader W, Stiasny K, Heinz FX, S  ss J (2010a) Seroprevalence of tick-borne encephalitis (TBE) in naturally exposed monkeys (*Macaca sylvanus*) and sheep and prevalence of TBE virus in ticks in a TBE endemic area in Germany. Ticks Tick Borne Dis 1(3):141–144, DOI 10.1016/j.ttbdis.2010.06.001
- Klaus C, Hoffmann B, Hering U, Mielke B, Sachse K, Beer M, S  ss J (2010b) Tick-borne encephalitis (TBE) virus prevalence and virus genome characterization in field-collected ticks (*Ixodes ricinus*) from risk, non-risk and former risk areas of TBE, and in ticks removed from humans in Germany. Clin Microbiol Infect 16(3):238–244, DOI 10.1111/j.1469-0691.2009.02764.x
- Klaus C, Beer M, Saier R, Schau U, Moog U, Hoffmann B, Diller R, S  ss J (2012) Goats and sheep as sentinels for tick-borne encephalitis (TBE) virus – Epidemiological studies in areas endemic and non-endemic for TBE virus in Germany. Ticks Tick Borne Dis 3(1):27–37, DOI 10.1016/j.ttbdis.2011.09.011
- Klaus C, H  r  gel U, Hoffmann B, Beer M (2013) Tick-borne encephalitis virus (TBEV) infection in horses: clinical and laboratory findings and epidemiological investigations. Vet Microbiol 163(3–4):368–372, DOI 10.1016/j.vetmic.2012.12.041
- Knap N, Korva M, Dolin  sek V, Sekirnik M, Trilar T, Av  si  -  Zupanc T (2012) Patterns of tick-borne encephalitis virus infection in rodents in Slovenia. Vector Borne Zoonotic Dis 12(3):236–242, DOI 10.1089/vbz.2011.0728
- Kowalewska A, Siwi  rska A, Gut W (1997) [Charakterystyka odpowiedzi immunologicznej dla wirusa kleszczowego zapalenia m  zgu w nowych ogniskach zachorowa  n w 1993 i 1995 roku]. Medycyna og  lna 3:283–289, cited after Pancer K, Gut W (2019) TBE in Poland. In: Dobler G, Erber W, Br  ker M, Schmitt HJ(eds) The TBE book, 2nd edn, Global Health Press Pte Ltd, chap 12b, pp 297–304, DOI 10.33442/978-981-14-0914-1\_12b-25
- Ko  zuch O, Gre    kov   M, Nosek J, Lichard M, Sekeyov   M (1967) The role of small rodents and hedgehogs in a natural focus of tick-borne encephalitis. Bull World Health Organ 36(Suppl. 1):61–66
- Krivanec K, Kopeck   J, Tomkov   E, Grubhoffer L (1988) Isolation of TBE virus from the tick *Ixodes hexagonus*. Folia Parasitol 35(3):273–276
- Kunz C, Frisch W, Hofmann H, Radda A, Pretzmann G (1967) Follow-up studies of tick-borne encephalitis (ecological, epidemiological and experimental laboratory studies). Final technical report for the European Research Office, contract number 91-591-EUC-4031, Institute for Hygiene, University of Vienna, 66 p.
- Kunz C, Asp  ock H, Frisch W, Hofmann H, Radda A (1969) Studies on tick-borne encephalitis and other arthropod-borne virus diseases. Final technical report for the European Research Office, contract number JA37-68-C-1422, Institute for Hygiene, University of Vienna, 88 p.
- Kup  a AM, Essbauer S, Zoeller G, de Mendon  a PG, Brey R, Rinder M, Pfister K, Spiegel M, Doerrbecker B, Pfeffer M, Dobler G (2010) Isolation and molecular characterization of a tick-borne

- encephalitis virus strain from a new tick-borne encephalitis focus with severe cases in Bavaria, Germany. *Ticks Tick Borne Dis* 1(1):44–51, DOI 10.1016/j.ttbdis.2009.11.002
- Laaksonen M, Sajanti E, Sormunen JJ, Penttinen R, Hänninen J, Ruohomäki K, Sääksjärvi I, Vesterinen EJ, Vuorinen I, Hytönen J, Klemola T (2017) Crowdsourcing-based nationwide tick collection reveals the distribution of *Ixodes ricinus* and *I. persulcatus* and associated pathogens in Finland. *Emerg Microbes Infect* 6(1):1–7, DOI 10.1038/emi.2017.17
- Labuda M, Elecková E, Licková M, Sabó A (2002) Tick-borne encephalitis virus foci in Slovakia. *Int J Med Microbiol* 291(Suppl. 33):43–47, DOI 10.1016/S1438-4221(02)80008-X
- Lakos A, Bán E, Schneider F, Nagy A, Mezei E (2019) TBE in Hungary. In: Dobler G, Erber W, Bröker M, Schmitt HJ (eds) *The TBE book*, 2nd edn, Global Health Press Pte Ltd, chap 12b, pp 297–304, DOI 10.33442/978-981-14-0914-1\_12b-14
- Larsen AL, Kanestrøm A, Bjørland M, Andreassen Å, Soleng A, Vene S, Dudman SG (2014) Detection of specific IgG antibodies in blood donors and tick-borne encephalitis virus in ticks within a non-endemic area in southeast Norway. *Scand J Infect Dis* 46(3):181–184, DOI 10.3109/00365548.2013.865140
- Levanov L, Vera CP, Vapalahti O (2016) Prevalence estimation of tick-borne encephalitis virus (TBEV) antibodies in dogs from Finland using novel dog anti-TBEV IgG MAb-capture and IgG immunofluorescence assays based on recombinant TBEV subviral particles. *Ticks Tick Borne Dis* 7(5):979–982, DOI 10.1016/j.ttbdis.2016.05.002
- Lindblom P, Wilhelmsson P, Fryland L, Sjöwall J, Haglund M, Matussek A, Ernerudh J, Vene S, Nyman D, Andreassen Å, Forsberg P, Lindgren PE (2014) Tick-borne encephalitis virus in ticks detached from humans and follow-up of serological and clinical response. *Ticks Tick Borne Dis* 5(1):21–28, DOI 10.1016/j.ttbdis.2013.07.009
- Lindhe KES, Meldgaard DS, Jensen PM, Houser GA, Berendt M (2009) Prevalence of tick-borne encephalitis virus antibodies in dogs from Denmark. *Acta Vet Scand* 51(1):56, DOI 10.1186/1751-0147-51-56
- Lommano E, Burri C, Maeder G, Guerne M, Bastic V, Patalas E, Gern L (2012) Prevalence and genotyping of tick-borne encephalitis virus in questing *Ixodes ricinus* ticks in a new endemic area in Western Switzerland. *J Med Entomol* 49(1):156–164, DOI 10.1603/me11044
- Makówka A, Gut W, Stefanoff P (2009) [Detection of TBEV RNA in ticks as a tool for valuation of endemic area and sensitivity of TBE surveillance]. *Przegl Epidemiol* 63:37–380, in Polish
- Mehlhorn H, Mehlhorn T, Müller M, Vogt M, Rissland J (2015) Tick survey for prevalent pathogens in peri-urban recreation sites in Saarland and Rhineland-Palatinate (Germany). *Parasitol Res* 115(3):1167–1172, DOI 10.1007/s00436-015-4852-x
- Melik W, Nilsson AS, Johansson M (2007) Detection strategies of tick-borne encephalitis virus in Swedish *Ixodes ricinus* reveal evolutionary characteristics of emerging tick-borne flaviviruses. *Arch Virol* 152(5):1027–1034, DOI 10.1007/s00705-006-0922-9
- Mierzejewska EJ, Pawełczyk A, Radkowski M, Welc-Falęciak R, Bajer A (2015) Pathogens vectored by the tick, *Dermacentor reticulatus*, in endemic regions and zones of expansion in Poland. *Parasit Vectors* 8:490, DOI 10.1186/s13071-015-1099-4
- Müller K (2006) [Untersuchungen zum Vorkommen von Antikörpern gegen das "Tick Borne Encephalitis Virus" (TBEV) bei Pferden im Endemiegebiet Marburg-Biedenkopf]. PhD thesis, Justus-Liebig-University Giessen, in German, 111 p.
- Müller W (1970) [Experimentelle Untersuchungen über das Vorkommen von Arboviren in Unterfranken. 1. Teil: Versuche zur Virusisolierung aus Zecken]. *Zbl Bakt, I Abt Orig* 214(2):145–159, in German
- Nosek J, Kožuch O, Grulich I (1970) The structure of tick-borne encephalitis (TBE) foci in Central



- Europe. *Oecologia* 5(1):61–73, DOI 10.1007/bf00345976
- Oehme R, Hartelt K, Backe H, Brockmann S, Kimmig P (2002) Foci of tick-borne diseases in Southwest Germany. *Int J Med Microbiol* 291(Suppl. 33):22–29, DOI 10.1016/s1438-4221(02)80005-4
- Paulsen KM, Stuen S, das Neves CG, Suhel F, Gurung D, Soleng A, Stiasny K, Vikse R, Andreassen ÅK, Granquist EG (2018) Tick-borne encephalitis virus in cows and unpasteurized cow milk from Norway. *Zoonoses Public Health* 66(2):216–222, DOI 10.1111/zph.12554
- Perez-Eid C, Hannoun C, Rodhain F (1992) The Alsatian tick-borne encephalitis focus: Presence of the virus among ticks and small mammals. *Eur J Epidemiol* 8(2):178–186, DOI 10.1007/bf00144797
- Petersen A, Rosenstjerne MW, Rasmussen M, Fuursted K, Nielsen HV, O'Brien Andersen L, Bødker R, Fomsgaard A (2019) Field samplings of *Ixodes ricinus* ticks from a tick-borne encephalitis virus micro-focus in Northern Zealand, Denmark. *Ticks Tick Borne Dis* 10(5):1028–1032, DOI 10.1016/j.ttbdis.2019.05.005
- Pettersson JHO, Golovljova I, Vene S, Jaenson TGT (2014) Prevalence of tick-borne encephalitis virus in *Ixodes ricinus* ticks in northern Europe with particular reference to Southern Sweden. *Parasit Vectors* 7(1):102, DOI 10.1186/1756-3305-7-102
- Pintér R, Madai M, Vadkerti E, Németh V, Oldal M, Kemenesi G, Dallos B, Gyuranecz M, Kiss G, Bányai K, Jakab F (2013) Identification of tick-borne encephalitis virus in ticks collected in southeastern Hungary. *Ticks Tick Borne Dis* 4(5):427–431, DOI 10.1016/j.ttbdis.2013.04.008
- Pluta S (2011) [Epidemiology of *Coxiella burnetii*, *Rickettsia* spp., TBE-virus and hantavirus in Southern Germany with regards to climate changes]. PhD thesis, University of Hohenheim, Germany, in German, 255 p.
- Radda A, Hofmann H, Kozuch O, Kunz C, Nosek J, Zukrigl K (1971) [Ein Naturherd des Frühsommer-Meningoenzephalitis-Virus bei St. Florian]. *Anz Schädldk Pflanzenschutz Umweltschutz* 44(6):96–96, DOI 10.1007/BF02040652, in German
- Ramelow C, Süß J, Berndt D, Roggendorf M, Schreier E (1993) Detection of tick-borne encephalitis virus RNA in ticks (*Ixodes ricinus*) by the polymerase chain reaction. *J Virol Methods* 45(1):115–119, DOI 10.1016/0166-0934(93)90145-h
- Rieger MA, Nübling M, Müller W, Hasselhorn HM, Hofmann F (1999) Foxes as indicators for TBE endemicity—a comparative serological investigation. *Zbl Bacteriol* 289(5–7):610–618, DOI 10.1016/s0934-8840(99)80017-6
- Rieille N, Bressanelli S, Freire CCM, Arcioni S, Gern L, Péter O, Voordouw MJ (2014) Prevalence and phylogenetic analysis of tick-borne encephalitis virus (TBEV) in field-collected ticks (*Ixodes ricinus*) in southern Switzerland. *Parasit Vectors* 7(1):443, DOI 10.1186/1756-3305-7-443
- Rieille N, Klaus C, Hoffmann D, Péter O, Voordouw MJ (2017) Goats as sentinel hosts for the detection of tick-borne encephalitis risk areas in the Canton of Valais, Switzerland. *BMC Vet Res* 13:217, DOI 10.1186/s12917-017-1136-y
- Rijks JM, Montizaan MG, Bakker N, de Vries A, Van Gucht S, Swaan C, van den Broek J, Gröne A, Sprong H (2019) Tick-borne encephalitis virus antibodies in roe deer, the Netherlands. *Emerg Infect Dis* 25(2):342–345, DOI 10.3201/eid2502.181386
- Roelandt S, Heyman P, De Filette M, Vene S, Van der Stede Y, Caij AB, Tavernier P, Dobby A, De Bosschere H, Vyt P, Meersschaert C, Roels S (2011) Tick-borne encephalitis virus seropositive dog detected in Belgium: screening of the canine population as sentinels for public health. *Vector Borne Zoonotic Dis* 11(10):1371–1376, DOI 10.1089/vbz.2011.0647
- Roelandt S, Suin V, Riocreux F, Lamoral S, Van der Heyden S, Van der Stede Y, Lambrecht B, Caij B, Brochier B, Roels S, Van Gucht S (2014) Autochthonous tick-borne encephalitis virus-seropositive

- cattle in Belgium: a risk-based targeted serological survey. *Vector Borne Zoonotic Dis* 14(9):640–647, DOI 10.1089/vbz.2014.1576
- Roelandt S, Suin V, Van der Stede Y, Lamoral S, Marche S, Tignon M, Saiz JC, Escribano-Romero E, Casaer J, Brochier B, Van Gucht S, Roels S, Vervaeke M (2016) First TBEV serological screening in Flemish wild boar. *Infect Ecol Epidemiol* 6(1):31099, DOI 10.3402/iee.v6.31099
- Rosà R, Tagliapietra V, Manica M, Arnoldi D, Hauffe HC, Rossi C, Rosso F, Henttonen, Rizzoli A (2019) Changes in host densities and co-feeding pattern efficiently predict tick-borne encephalitis hazard in an endemic focus in northern Italy. *Int J Parasitol* 49(10):779–787, DOI 10.1016/j.ijpara.2019.05.006
- Salat J, Mihalca AD, Mihaiu M, Modrý D, Ruzek D (2017) Tick-borne encephalitis in sheep, Romania. *Emerg Infect Dis* 23(12):2065–2067, DOI 10.3201/eid2312.170166
- Sidorenko M, Radziewskaja J, Rosef O, Paulauskas A (2018) Investigation of the tick-borne encephalitis virus in Norway. *Biologija* 64(2):172–178, DOI 10.6001/biologija.v64i2.3741
- Šikutová S, Hornok S, Hubálek Z, Doležalková I, Juřicová Z, Rudolf I (2009) Serological survey of domestic animals for tick-borne encephalitis and Bhanja viruses in northeastern Hungary. *Vet Microbiol* 135(3–4):267–271, DOI 10.1016/j.vetmic.2008.09.082
- Širmarová J, Tichá L, Golovchenko M, Salát J, Grubhoffer L, Rudenko N, Nowotny N, Růžek D (2014) Seroprevalence of *Borrelia burgdorferi* sensu lato and tick-borne encephalitis virus in zoo animal species in the Czech Republic. *Ticks Tick Borne Dis* 5(5):523–527, DOI 10.1016/j.ttbdis.2014.03.008
- Skarphéðinsson S, Jensen PM, Kristiansen K (2005) Survey of tickborne infections in Denmark. *Emerg Infect Dis* 11(7):1055–1061, DOI 10.3201/eid1107.041265
- Skuballa JD (2011) The role of the European hedgehog (*Erinaceus europaeus*) in the epidemiology of tick-borne diseases (*Borrelia* spp., *Anaplasma* spp., *Rickettsia* spp. and TBE-virus). PhD thesis, Karlsruhe Institute of Technology, Germany, in German, 242 p.
- Smura T, Tonteri E, Jääskeläinen A, von Troil G, Kuivanen S, Huitu O, Kareinen L, Uusitalo J, Uusitalo R, Hannila-Handelberg T, Voutilainen L, Nikkari S, Sironen T, Sane J, Castrén J, Vapalahti O (2019) Recent establishment of tick-borne encephalitis foci with distinct viral lineages in the Helsinki area, Finland. *Emerg Microbes Infect* 8(1):675–683, DOI 10.1080/22221751.2019.1612279
- Sormunen JJ, Klemola T, Hänninen J, Mäkelä S, Vuorinen I, Penttinen R, Sääksjärvi IE, Vesterinen EJ (2018) The importance of study duration and spatial scale in pathogen detection—evidence from a tick-infested island. *Emerg Microbes Infect* 7(1):1–11, DOI 10.1038/s41426-018-0188-9
- Stefanoff P, Siennicka J, Kaba J, Nowicki M, Ferenczi E, Gut W (2008) Identification of new endemic tick-borne encephalitis foci in Poland – a pilot seroprevalence study in selected regions. *Int J Med Microbiol* 298(Suppl. 1):102–107, DOI 10.1016/j.ijmm.2008.04.002
- Stefanoff P, Pfeffer M, Hellenbrand W, Rogalska J, Rühle F, Makówka A, Michalik J, Wodecka B, Rymaszewska A, Kiewra D, Baumann-Popczyk A, Dobler G (2012) Virus detection in questing ticks is not a sensitive indicator for risk assessment of tick-borne encephalitis in humans. *Zoonoses Public Health* 60(3):215–226, DOI 10.1111/j.1863-2378.2012.01517.x
- Süss J, Béziat P, Ramelow C, Kahl O (1997) Tick-borne encephalitis virus (TBEV)-specific RT-PCR for characterization of natural foci of TBE and for other applications. *Zbl Bakteriol* 286(1):125–138, DOI 10.1016/s0934-8840(97)80084-9
- Süss J, Klaus C, Diller R, Schrader C, Wohanka N, Abel U (2006) TBE incidence versus virus prevalence and increased prevalence of the TBE virus in *Ixodes ricinus* removed from humans. *Int J Med Microbiol* 296(Suppl. 40):63–68, DOI 10.1016/j.ijmm.2005.12.005
- Tavernier P, Sys SU, De Clercq K, De Leeuw I, Caij AB, De Baere M, De Regge N, Fretin D, Roupie V, Govaerts M, Heyman P, Vanrompay D, Yin L, Kalmar I, Suin V, Brochier B, Dobby A, De Craeye

- S, Roelandt S, Goossens E, Roels S (2015) Serologic screening for 13 infectious agents in roe deer (*Capreolus capreolus*) in Flanders. *Infect Ecol Epidemiol* 5(1):29862, DOI 10.3402/iee.v5.29862
- Tonteri E, Jokelainen P, Matala J, Pusenius J, Vapalahti O (2016) Serological evidence of tick-borne encephalitis virus infection in moose and deer in Finland: sentinels for virus circulation. *Parasit Vectors* 9(1):54, DOI 10.1186/s13071-016-1335-6
- Traavik T (1973) Serological investigations indicating the existence of tick-borne encephalitis virus foci along the Norwegian coast. *APMIS* 81B(1):138–142, DOI 10.1111/j.1699-0463.1973.tb02197.x
- Traavik T, Mehl R, Wiger R (1978) The first tick-borne encephalitis virus isolates from Norway. *APMIS* 86B(1–6):253–256, DOI 10.1111/j.1699-0463.1978.tb00040.x
- von Zeipel G (1959) Isolation of viruses of the Russian spring-summer encephalitis-louping ill group from Swedish ticks and from a human case of meningoencephalitis. *Arch Gesamte Virusforsch* 9(4):460–469, DOI 10.1007/bf01242853
- von Zeipel G, Svedmyr A, Zetterberg B (1959) The geographical distribution in Sweden of viruses belonging to the Russian spring-summer-louping ill group. *Arch Gesamte Virusforsch* 9(4):449–459, DOI 10.1007/bf01242852
- Wandeler A, Steck F, Fankhauser R, Kammermann B, Grešková M, Blašcovič D (1972) Isolierung des Virus der zentraleuropäischen Zeckenzephalitis in der Schweiz. *Path Microbiol* 38(4):258–270, DOI 10.1159/000162416
- Weidmann M, Růžek D, Křivanec K, Zöller G, Essbauer S, Pfeffer M, de A Zanotto PM, Hufert FT, Dobler G (2011) Relation of genetic phylogeny and geographical distance of tick-borne encephalitis virus in central Europe. *J Gen Virol* 92(8):1906–1916, DOI 10.1099/vir.0.032417-0
- Weissenböck H, Suchy A, Holzmann H (1998) Tick-borne encephalitis in dogs: neuropathological findings and distribution of antigen. *Acta Neuropathol* 95(4):361–366, DOI 10.1007/s004010050811
- Wicki R, Sauter P, Mettler C, Natsch A, Enzler T, Pusterla N, Kuhnert P, Egli G, Bernasconi M, Lienhard R, Lutz H, Leutenegger CM (2000) Swiss army survey in Switzerland to determine the prevalence of *Francisella tularensis*, members of the *Ehrlichia phagocytophila* genogroup, *Borrelia burgdorferi* sensu lato, and tick-borne encephalitis virus in ticks. *Eur J Clin Microbiol Infect Dis* 19(6):427–432, DOI 10.1007/s100960000283
- Wójcik-Fatla A, Cisak E, Zajac V, Zwoliński J, Dutkiewicz J (2011) Prevalence of tick-borne encephalitis virus in *Ixodes ricinus* and *Dermacentor reticulatus* ticks collected from the Lublin region (eastern Poland). *Ticks Tick Borne Dis* 2(1):16–19, DOI 10.1016/j.ttbdis.2010.10.001
- Ytrehus B, Vainio K, Dudman SG, Gilray J, Willoughby K (2013) Tick-borne encephalitis virus and Louping-ill virus may co-circulate in Southern Norway. *Vector Borne Zoonotic Dis* 13(10):762–768, DOI 10.1089/vbz.2012.1023
- Zajac V, Wójcik-Fatla A, Sawczyn A, Cisak E, Sroka J, Kloc A, Zajac Z, Buczek A, Dutkiewicz J, Bartosik K (2017) Prevalence of infections and co-infections with 6 pathogens in *Dermacentor reticulatus* ticks collected in eastern Poland. *Ann Agric Environ Med* 24(1):26–32, DOI 10.5604/12321966.1233893
- Zöldi V, Papp T, Rigó K, Farkas J, Egyed L (2014) A 4-year study of a natural tick-borne encephalitis virus focus in Hungary, 2010–2013. *EcoHealth* 12(1):174–182, DOI 10.1007/s10393-014-0969-0
